# Supplementary material for: Mapping resistance to powdery mildew in barley reveals a large-effect nonhost resistance QTL
Source: PubMed Central journal article supplement (PMC5895680; doi:10.1007/s00122-018-3055-0), 2018-01-25

Article title: Mapping Resistance to Powdery Mildew in Barley Reveals a Large-Effect Nonhost Resistance QTL

Authors: Cynara C. T. Romero, Jasper P. Vermeulen, Anton Vels, Axel Himmelbach, Martin Mascher and Rients E. Niks

Author for correspondence: Rients E. Niks, Wageningen University and Research

Email: [rients.niks@wur.nl](mailto:rients.niks@wur.nl)

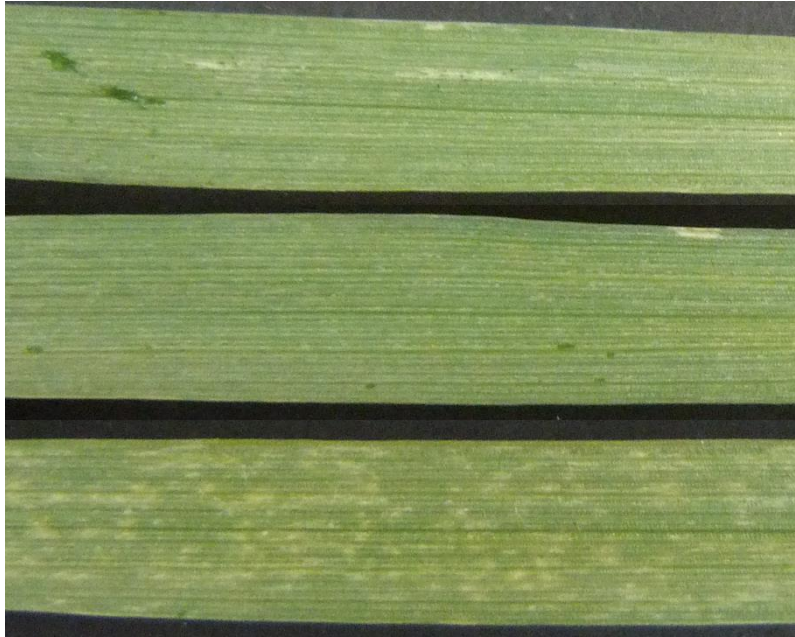

Supplement: 122_2018_3055_MOESM8_ESM.pdf [file 122_2018_3055_MOESM8_ESM.pdf]
